# Supplementary material
Source: publisher figshare collection journal article supplement (https://acs.figshare.com/ndownloader/files/17922932)
Supplement: Supplementary file 1 [file 17922932]

# Alternative electron transport layer based on Al-doped ZnO and SnO<sub>2</sub> for perovskite solar cells: impact on microstructure and stability

*Manon SPALLA <sup>a,b</sup>, Emilie PLANES <sup>a,\*</sup>, Lara PERRIN <sup>a</sup>, Muriel MATHERON <sup>b</sup>, Solenn BERSON <sup>b</sup>, Lionel FLANDIN <sup>a</sup>*

<sup>a</sup> Univ. Grenoble Alpes, Univ. Savoie Mont Blanc, CNRS, Grenoble INP, LEPMI, 38000 Grenoble, France

<sup>b</sup> Univ. Grenoble Alpes, CEA, LITEN, INES, 73375 Le Bourget du Lac, France

*\*emilie.planes@univ-smb.fr*

## Supporting Information

|                  | 10s                                                                               | 1min                                                                              | 10min                                                                             | 35min                                                                               | 60min                                                                               |
|------------------|-----------------------------------------------------------------------------------|-----------------------------------------------------------------------------------|-----------------------------------------------------------------------------------|-------------------------------------------------------------------------------------|-------------------------------------------------------------------------------------|
| AZO              |  |  |  |  |                                                                                     |
| SnO <sub>2</sub> |                                                                                   |  |  |  |  |

Figure S1: Photographs of substrates showing the influence of the annealing time (100°C) for the perovskite layer formation and decomposition depending on the ETL underlying layer used (AZO or SnO<sub>2</sub>) – red squares indicate chosen optimized conditions.

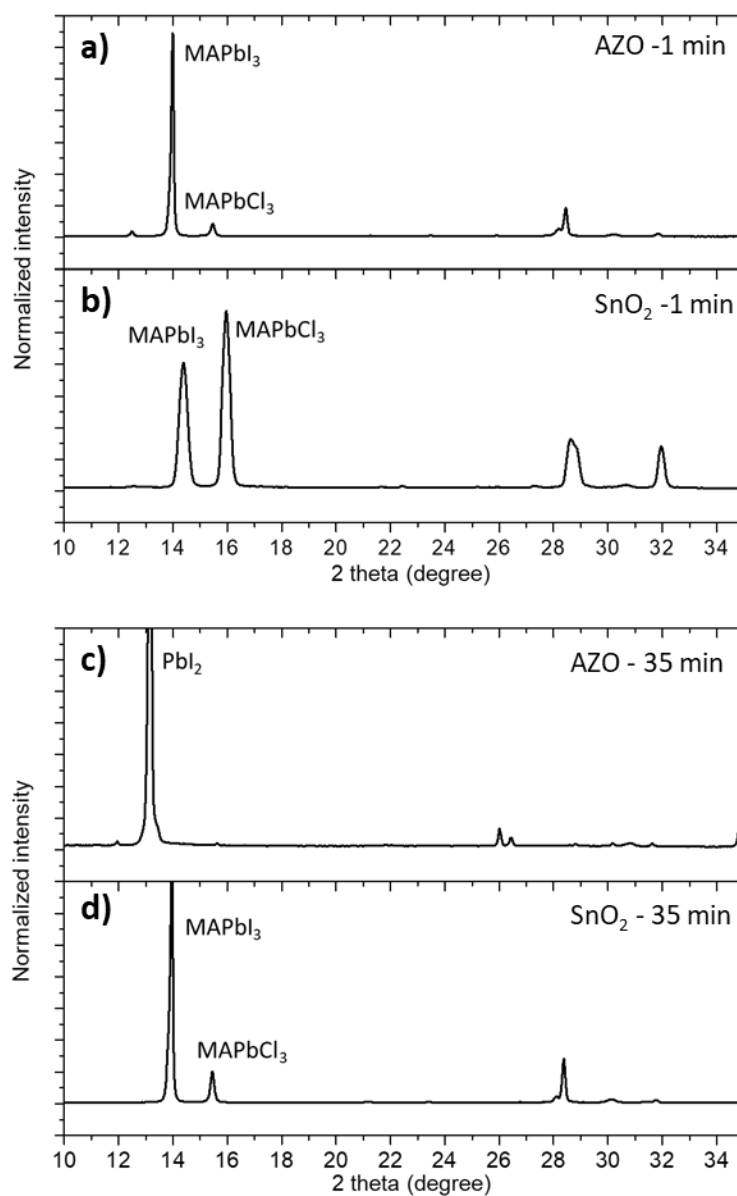

Figure S2: XRD diffractograms of perovskite annealed at 100°C : for 1 min on a) AZO and b)  $\text{SnO}_2$  and for 35 min on c) AZO and d)  $\text{SnO}_2$  (intensity normalized with ITO).

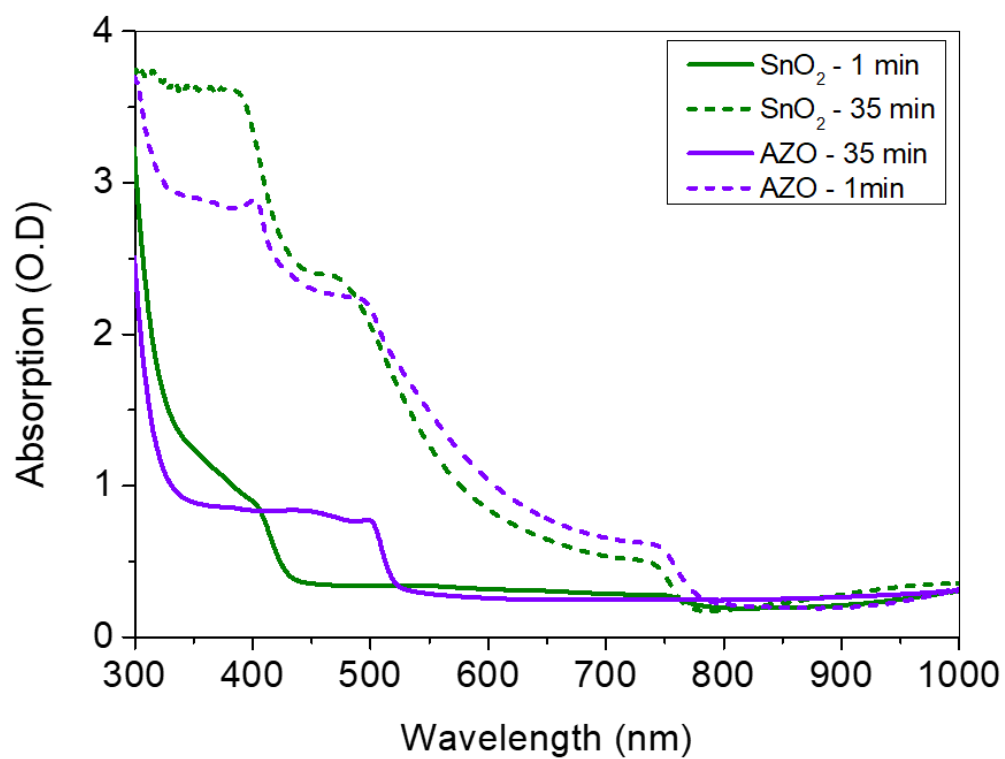

Figure S3: UV-visible absorption spectra of perovskite on AZO and SnO<sub>2</sub> layers after 100°C annealing for both 1 and 35 min.

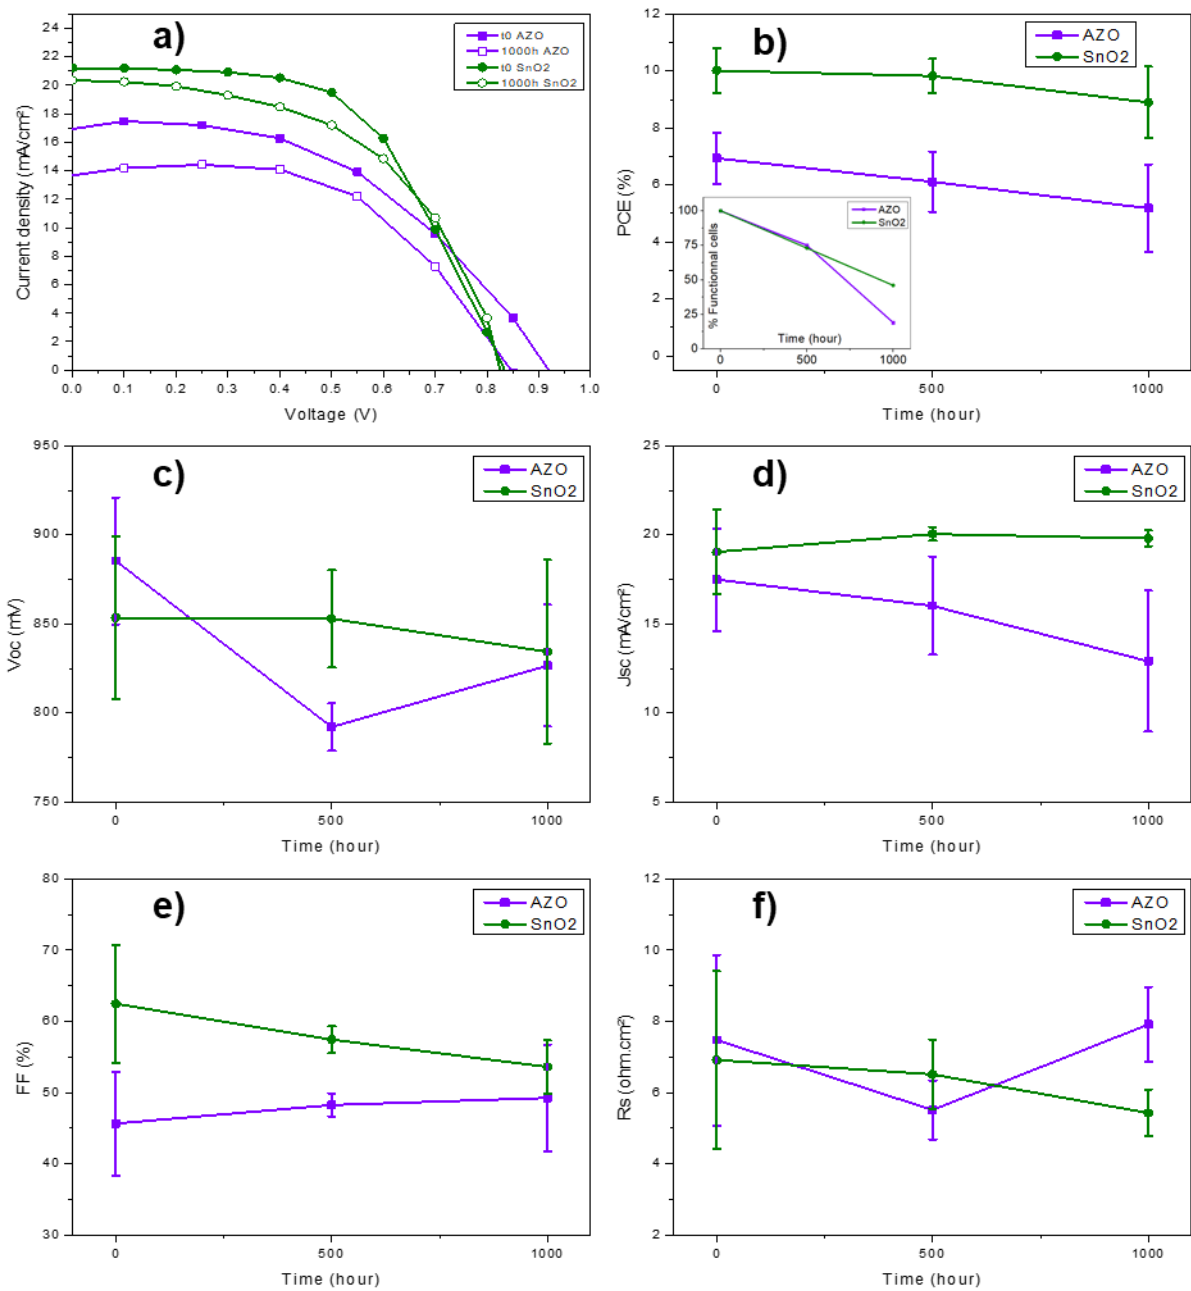

Figure S4: a) J-V curves for both architectures before and after 1000 h aging; b) PCE (%) for functional cells and quantification (%) of remaining functional cells; c)  $V_{oc}$  (mV), d)  $J_{sc}$  ( $\text{mA}\cdot\text{cm}^{-2}$ ), e) FF (%) and f)  $R_s$  ( $\text{ohm}\cdot\text{cm}^2$ ) parameters for both architectures during aging campaigns.

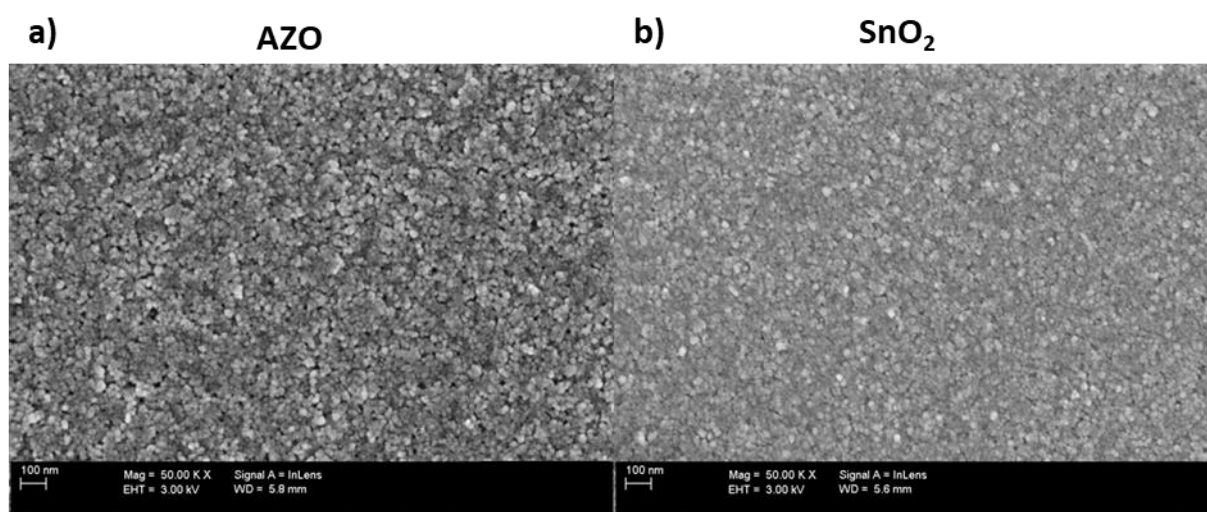

Figure S5: SEM surface images of a) AZO and b) SnO<sub>2</sub> layers.

**a) AZO**

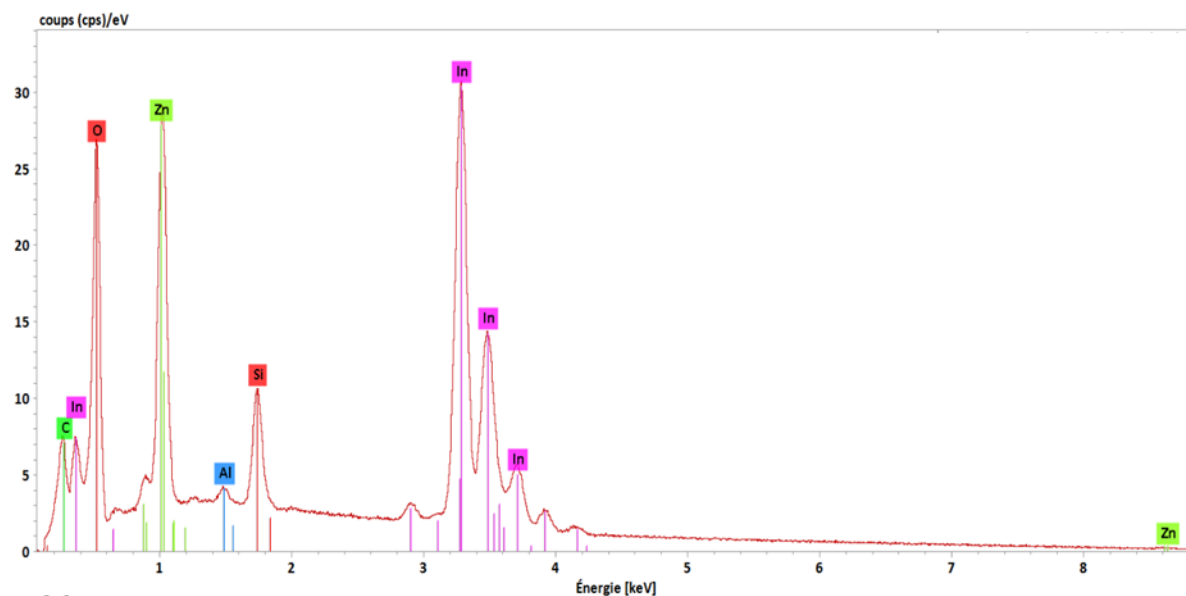

**b) SnO<sub>2</sub>**

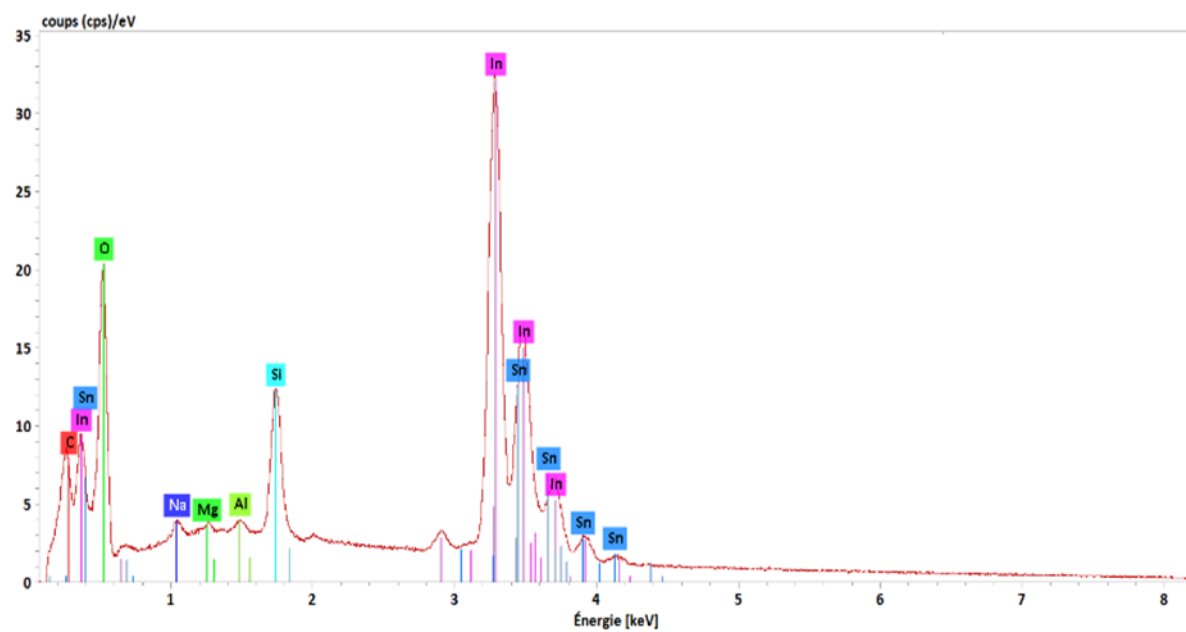

Figure S6: EDX analyses of a) AZO and b) SnO<sub>2</sub> layers.

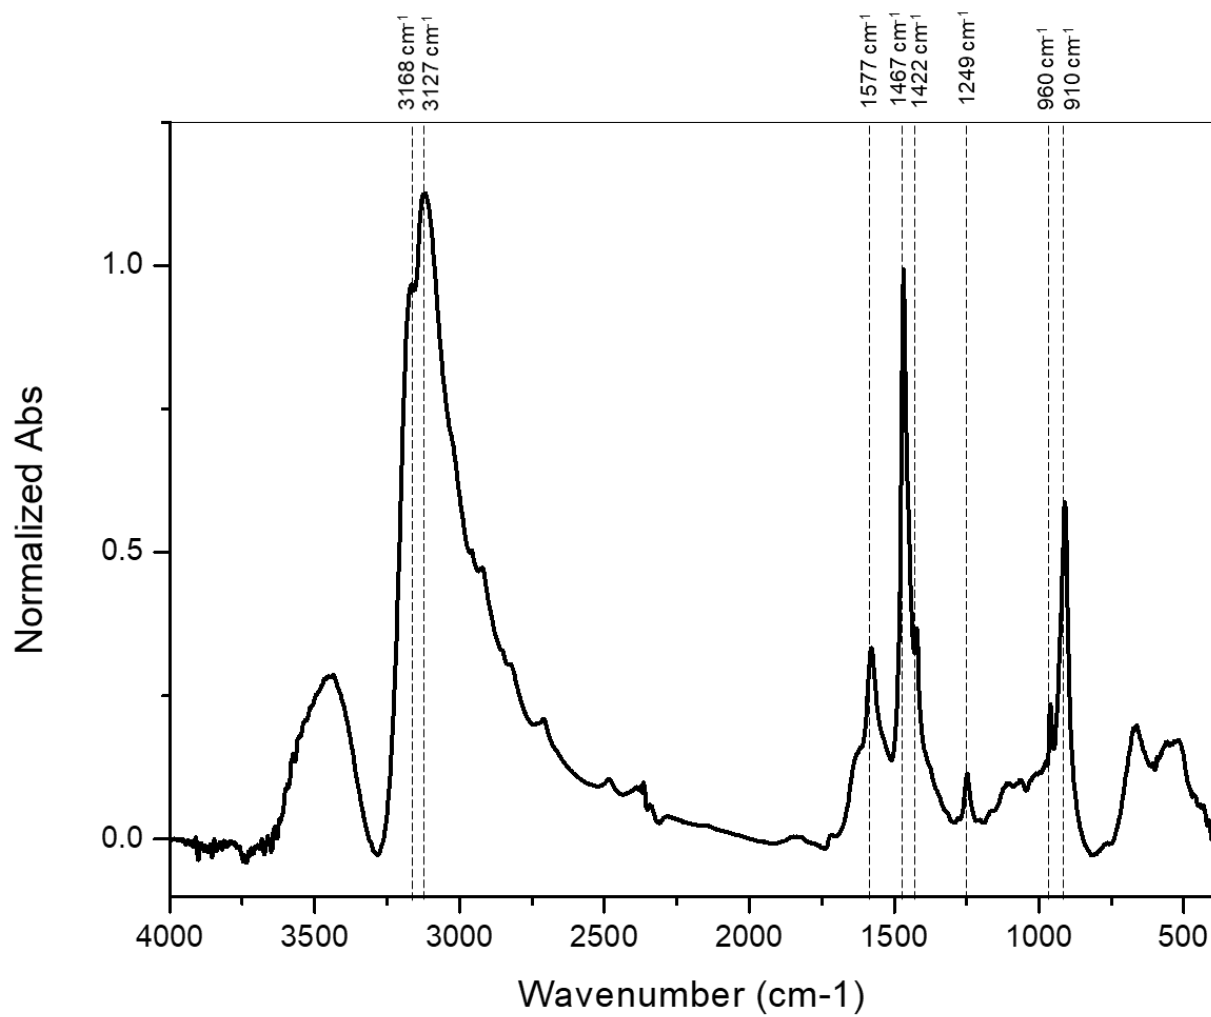

Figure S7: Full range FTIR spectrum of a MAPbI<sub>3-x</sub>Cl<sub>x</sub> layer (on SnO<sub>2</sub>) with bands assignment.



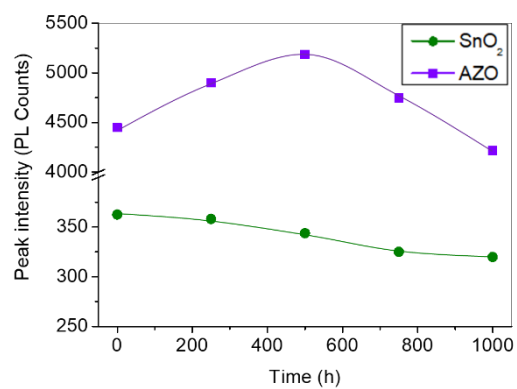

Figure S8: Variation of PL intensity with aging time on both AZO and SnO<sub>2</sub> perovskite half cells.

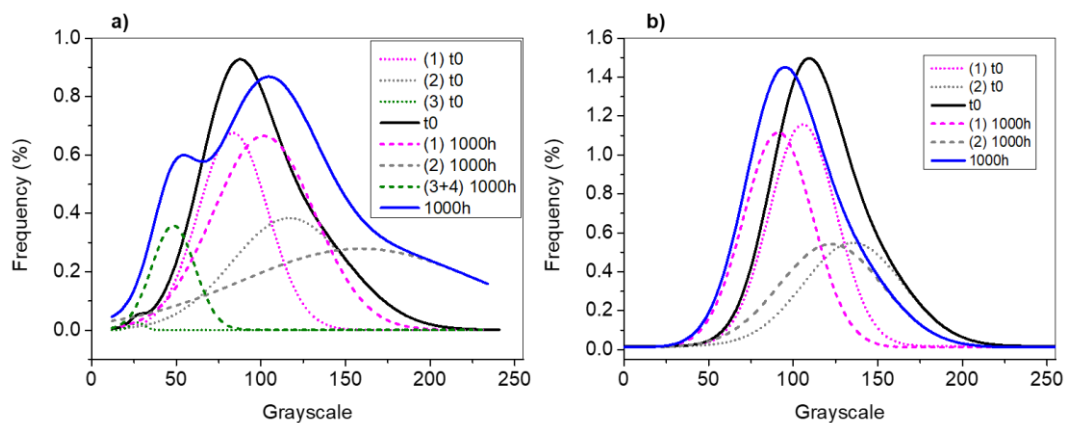

Figure S9: Evolution with time of the grayscale distribution of SEM images on both (a) AZO and (b) SnO<sub>2</sub> systems.

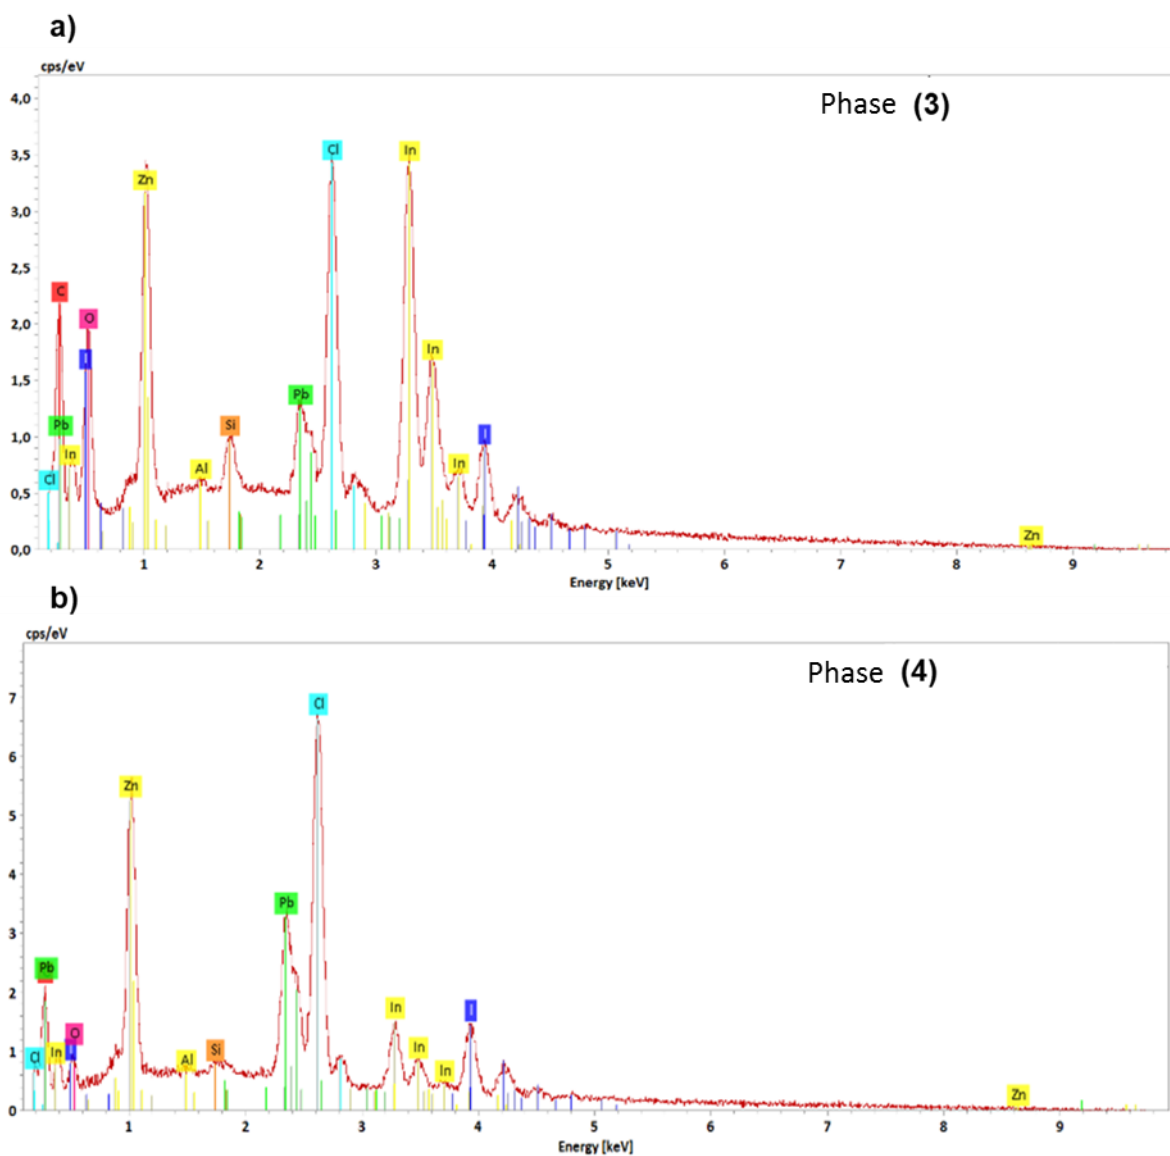

Figure S10: Raw EDS spectra with precise attributions for phases a) (3) and b) (4)

|                  | Time (hour) | Voc (mV) | Jsc (mA/cm <sup>2</sup> ) | FF (%) | PCE (%)   | Rs (ohm.cm <sup>2</sup> ) |
|------------------|-------------|----------|---------------------------|--------|-----------|---------------------------|
| AZO              | 0           | 885 ± 36 | 17.4 ± 2.9                | 46 ± 7 | 6.9 ± 0.9 | 7.4 ± 2.4                 |
|                  | 500         | 792 ± 13 | 16 ± 2.8                  | 48 ± 2 | 6.1 ± 1.1 | 5.5 ± 0.8                 |
|                  | 1000        | 826 ± 34 | 12.9 ± 4.0                | 49 ± 7 | 5.2 ± 1.5 | 7.9 ± 1.1                 |
| SnO <sub>2</sub> | 0           | 853 ± 46 | 19 ± 2.4                  | 62 ± 8 | 10 ± 0.8  | 6.9 ± 2.5                 |
|                  | 500         | 853 ± 27 | 20 ± 0.4                  | 57 ± 2 | 9.8 ± 0.6 | 6.5 ± 1.0                 |
|                  | 1000        | 834 ± 52 | 19.8 ± 0.5                | 53 ± 4 | 8.9 ± 1.3 | 5.4 ± 0.7                 |

Table S1: PV parameters for both architectures during aging tests.

| Wavenumbers (cm <sup>-1</sup> ) | Peaks assignment                                                    |
|---------------------------------|---------------------------------------------------------------------|
| 910                             | CH <sub>3</sub> - NH <sub>3</sub> <sup>+</sup> rock v <sub>12</sub> |
| 960                             | C – N stretch v <sub>5</sub>                                        |
| 1249                            | CH <sub>3</sub> - NH <sub>3</sub> <sup>+</sup> rock v <sub>11</sub> |
| 1376                            | Sym. CH <sub>3</sub> bend v <sub>4</sub>                            |
| 1422                            | Asym. CH <sub>3</sub> bend v <sub>10</sub>                          |
| 1467                            | Sym. NH <sub>3</sub> <sup>+</sup> bend v <sub>3</sub>               |
| 1577                            | Asym. NH <sub>3</sub> <sup>+</sup> bend v <sub>9</sub>              |
| 3127                            | Sym NH <sub>3</sub> <sup>+</sup> stretch v <sub>1</sub>             |
| 3168                            | Asym NH <sub>3</sub> <sup>+</sup> stretch v <sub>7</sub>            |

Table S2: Assignment of MAPbI<sub>3-x</sub>Cl<sub>x</sub> FTIR vibration bands.

| Material            | Orientation | Position (°)  |
|---------------------|-------------|---------------|
| PbI <sub>2</sub>    |             | 12.46         |
| MAPbI <sub>3</sub>  | (110) (002) | 13.94         |
| MAPbCl <sub>3</sub> | (100)       | 15.46         |
| ITO                 |             | 21.30         |
| PbCl <sub>2</sub>   |             | 23.47         |
| PbI <sub>2</sub>    |             | 25.89         |
| MAPbI <sub>3</sub>  | (220) (004) | 28.19 ; 28.39 |
| ITO                 |             | 30.24         |
| MAPbCl <sub>3</sub> | (200)       | 31.86         |

Table S3: XRD peaks assignment (according Cu source equivalent values).

|                  |       | (1) MAPbI <sub>3-x</sub> Cl <sub>x</sub> | (2) MAPbI <sub>3-x</sub> Cl <sub>x</sub> + PbI <sub>2</sub> | (3) MACl + porosity | (4) PbX <sub>2</sub> + porosity |
|------------------|-------|------------------------------------------|-------------------------------------------------------------|---------------------|---------------------------------|
| AZO              | t0    | 52 %                                     | 46 %                                                        | 2 %                 |                                 |
|                  | 1000h | 45 %                                     | 45 %                                                        | 10 %                |                                 |
| SnO <sub>2</sub> | t0    | 100%                                     |                                                             |                     |                                 |
|                  | 1000h | 100%                                     |                                                             |                     |                                 |

Table S4: Repartition of the different identified phases depending on both aging time and ETL layer nature, determined according to the surface grayscale analysis of SEM images (see Figure S9) and EDS analyses.
